# Supplementary material for: In situ Fabrication of α-Bi2O3/(BiO)2CO3 Nanoplate Heterojunctions with Tunable Optical Property and Photocatalytic Activity
Source: PubMed Central journal article supplement (PMC4807223; doi:10.1038/srep23435), 2016-03-21
Supplement: srep23435-s1.pdf [file srep23435-s1.pdf]

# *Supporting Information*

## ***In situ* Fabrication of $\alpha$ -Bi<sub>2</sub>O<sub>3</sub>/(BiO)<sub>2</sub>CO<sub>3</sub> Nano-Plate Heterojunctions with Tunable Optical Properties and Photocatalytic Activity**

Yu Huang<sup>1,2,\*</sup>, Wei Wang<sup>1</sup>, Qian Zhang<sup>1</sup>, Jun-ji Cao<sup>1,2</sup>, Ru-jin Huang<sup>1,2</sup>, Wingkei Ho<sup>3,\*</sup>,  
and Shun Cheng Lee<sup>4</sup>

<sup>1</sup> *Key Laboratory of Aerosol Chemistry and Physics, Institute of Earth Environment, Chinese Academy of Sciences, Xi'an 710061, China.*

<sup>2</sup> *State Key Lab of Loess and Quaternary Geology (SKLLQG), Institute of Earth Environment, Chinese Academy of Sciences, Xi'an 710061, China.*

<sup>3</sup> *Department of Science and Environmental Studies, The Hong Kong Institute of Education, Hong Kong, China.*

<sup>4</sup> *Department of Civil and Environmental Engineering, The Hong Kong Polytechnic University, Hung Hom, Hong Kong.*

*Submitted to: Scientific Reports*

\*Corresponding authors:

Prof. Yu Huang, E-mail address: [huangyu@ieecas.cn](mailto:huangyu@ieecas.cn)

Dr. Wing-kei Ho, E-mail address: [keithho@ied.edu.hk](mailto:keithho@ied.edu.hk)

## Supplementary figures

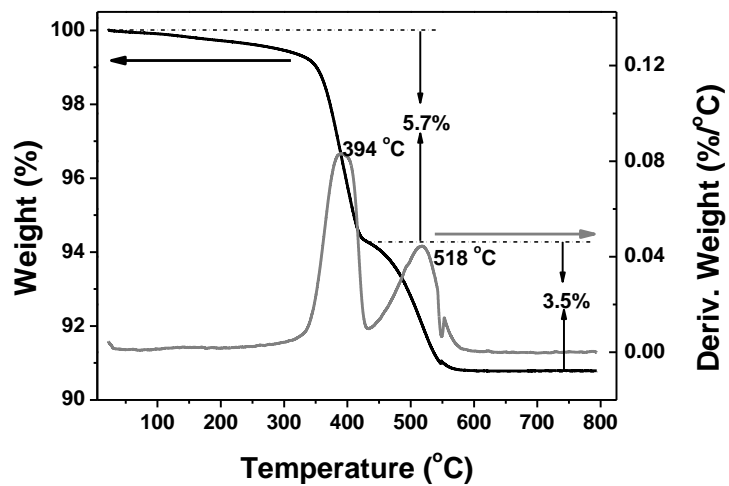

Figure S1 TGA profiles of  $(\text{BiO})_2\text{CO}_3$  powders in air flow.

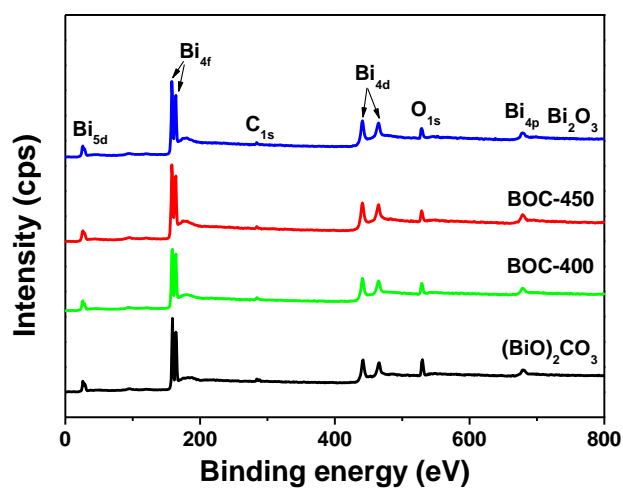

Figure S2 XPS survey spectra of the samples.

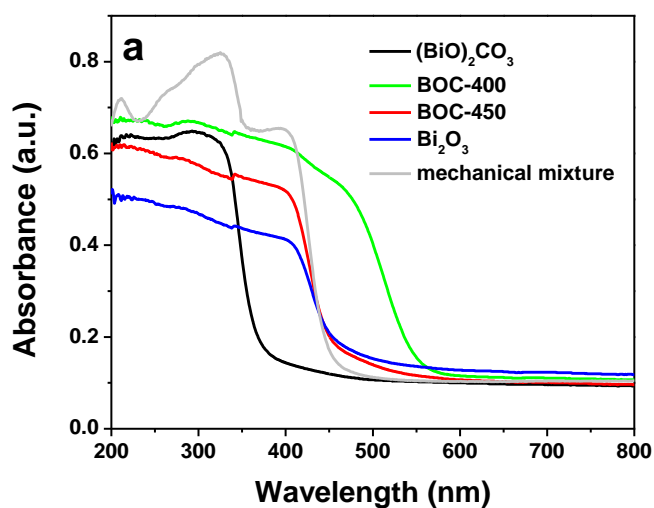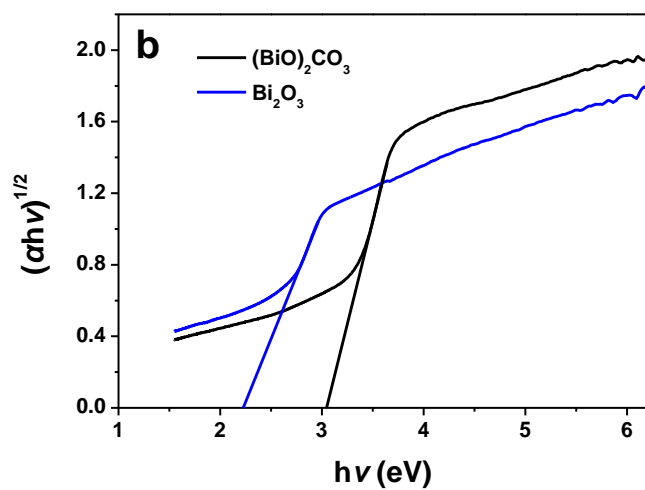

**Figure S3** (a) UV–visible diffuse reflectance spectra of the as-prepared samples and the mechanical mixture composed of 54.99%  $(\text{BiO})_2\text{CO}_3$  and 45.01%  $\text{Bi}_2\text{O}_3$ . (b) Plots of  $(ah\nu)^{1/2}$  versus energy ( $h\nu$ ) for the as-prepared samples.

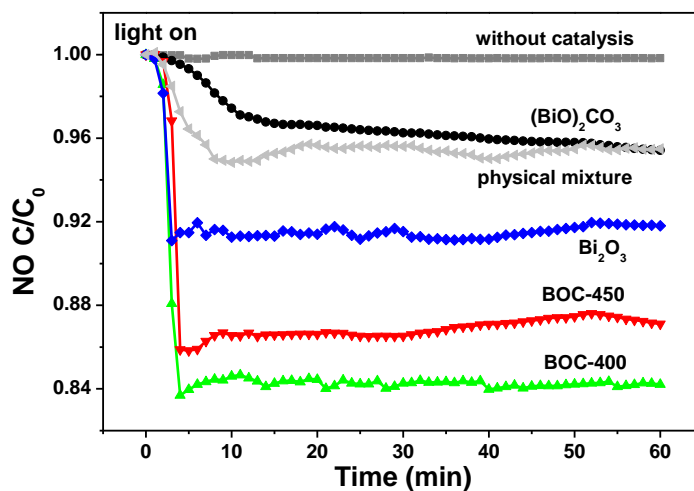

**Figure S4** Photocatalytic activities of  $(\text{BiO})_2\text{CO}_3$ , BOC-400, BOC-450,  $\text{Bi}_2\text{O}_3$  and physical mixture under visible light irradiation for NO removal.

## Supplementary Tables

**Table S1** Results of Carbon and  $(\text{BiO})_2\text{CO}_3$  contents in all samples

|                                                                    | $(\text{BiO})_2\text{CO}_3$ | BOC-400 | BOC-450 | $\text{Bi}_2\text{O}_3$ |
|--------------------------------------------------------------------|-----------------------------|---------|---------|-------------------------|
| Elemental analysis C (%) found                                     | 2.342                       | 1.137   | 1.027   | 0.124                   |
| Stoichiometry C (%)                                                | 2.353                       | —       | —       | 0.000                   |
| $(\text{BiO})_2\text{CO}_3$ (%) calculated from elemental analysis | 99.530                      | 54.990  | 43.600  | 5.300                   |

**Table S2** Results of BET Surface Area and IC

| Samples                     | BET Surface Area ( $\text{m}^2/\text{g}$ ) | $\text{NO}_2^-$ ( $\mu\text{g}/\text{g}$ ) | $\text{NO}_3^-$ ( $\mu\text{g}/\text{g}$ ) |
|-----------------------------|--------------------------------------------|--------------------------------------------|--------------------------------------------|
| $(\text{BiO})_2\text{CO}_3$ | 1.93                                       | 5.3558                                     | 81.9841                                    |
| BOC-400                     | 4.32                                       | 9.8051                                     | 230.9105                                   |
| BOC-450                     | 0.96                                       | 5.4512                                     | 136.0915                                   |
| $\text{Bi}_2\text{O}_3$     | 0.66                                       | 18.1312                                    | 100.4016                                   |
| Mechanical mixture          | 1.25                                       | —                                          | —                                          |
